# Supplementary material for: Effective synthesis of benzodiazepine sulfonamide-based MGAT2 inhibitors and evaluation of their antitumor activity
Source: Royal Society of Chemistry journal article supplement (doi:10.1039/d5ra01108f), 2025-01-01
Supplement: d5ra01108f1.pdf [file d5ra01108f1.pdf]

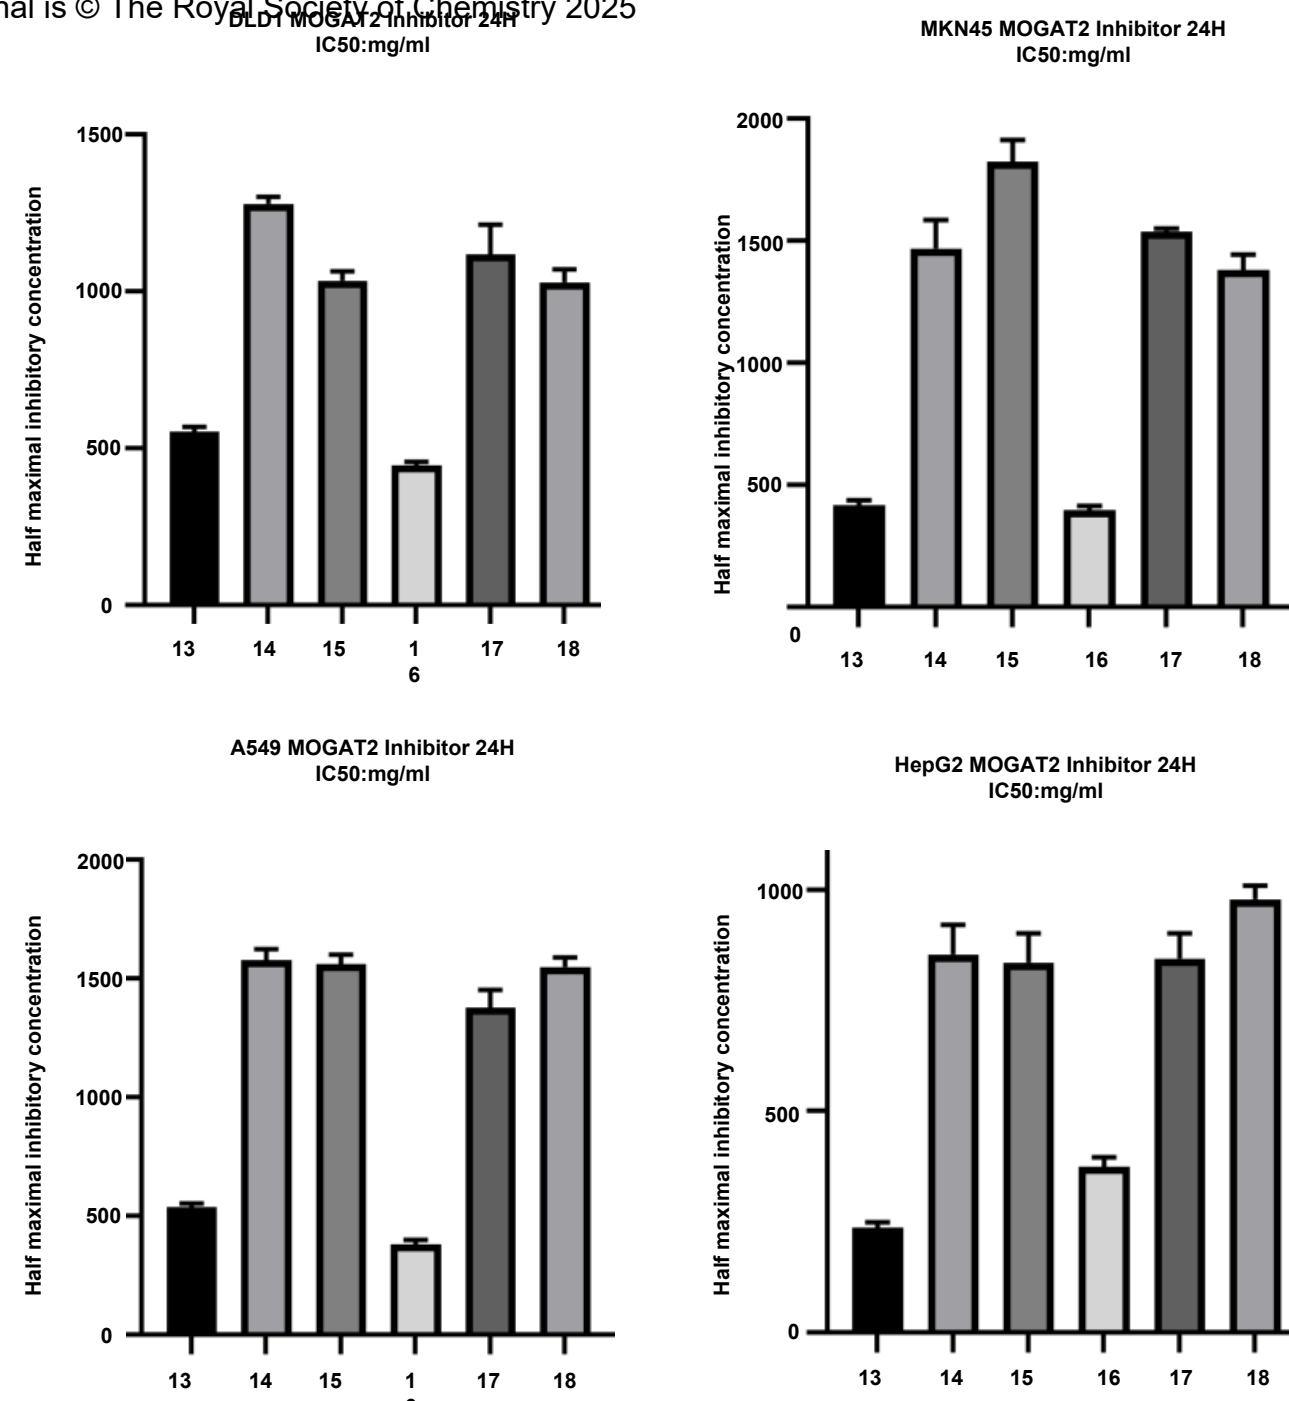

Fig. 1 IC50 values of the synthesized benzodiazepine sulfonamide compounds in cancer cells DLD1, A549, MKN45 and HepG2 cells were incubated with a gradient dilution of MGAT2 inhibitors (0-1000  $\mu\text{g/mL}$ ) for 24 h, and cell viability was determined by the CCK-8 assay.
